# Supplementary material for: Evidence for a Non-Catalytic Ion-Binding Site in Multiple RNA-Dependent RNA Polymerases
Source: PubMed Central journal article supplement (PMC3394715; doi:10.1371/journal.pone.0040581), 2012-07-11
Supplement: pone.0040581.s002.pdf [file pone.0040581.s002.pdf]

Supporting information Table S1. The RNA polymerase structures of the ssRNA viruses and dsRNA viruses

Positive-sense ssRNA viruses

| Family        | Genus         | Species                   | PDB ID | Resolution (Å) | Catalytic ion A <sup>1</sup> | Catalytic ion B  | Non-catalytic ion, C       | Ligands <sup>2</sup>       | Stage of replication | Metal interactions                         | Presence of template and primer, mutations                            | Purification and storage                                   | Crystallization                                                                                                                                                                     |                                                                                                                         |
|---------------|---------------|---------------------------|--------|----------------|------------------------------|------------------|----------------------------|----------------------------|----------------------|--------------------------------------------|-----------------------------------------------------------------------|------------------------------------------------------------|-------------------------------------------------------------------------------------------------------------------------------------------------------------------------------------|-------------------------------------------------------------------------------------------------------------------------|
| Caliciviridae | Lagovirus     | rabbit haemorrhagic virus | 1KHV   | 2.50           | ----                         | ----             | Lu <sup>2+</sup> (B chain) | ----                       | ----                 | C: D355, G356, L249                        | ----                                                                  | column wash: 0.25 mM EDTA storage: 10 mM MgCl <sub>2</sub> | crystallization: 5 mM LuCl <sub>2</sub>                                                                                                                                             |                                                                                                                         |
|               |               | rabbit haemorrhagic virus | 1KHW   | 2.70           | Mn <sup>2+</sup>             | Mn <sup>2+</sup> | ----                       | ----                       | ----                 | A: D354, D355, D250<br>B: D354, T251, D250 | ----                                                                  | column wash: 0.25 mM EDTA storage: 10 mM MgCl <sub>2</sub> | crystallization: 50 mM Mg(NO <sub>3</sub> ) <sub>2</sub> , Soaking: 18 mM MnCl <sub>2</sub> , 10 mM 3'-deoxy-ATP                                                                    |                                                                                                                         |
|               | Norovirus     | Norwalk virus             | 1SH0   | 2.17           | ----                         | ----             | ----                       | ----                       | ----                 | ----                                       | ----                                                                  | ----                                                       | column equilibration and elution: 0.25 mM EDTA                                                                                                                                      | ----                                                                                                                    |
|               |               | Norwalk virus             | 1SH2   | 2.30           | ----                         | ----             | ----                       | ----                       | ----                 | ----                                       | ----                                                                  | ----                                                       | column equilibration and elution: 0.25 mM EDTA                                                                                                                                      | ----                                                                                                                    |
|               |               | Norwalk virus             | 1SH3   | 2.95           | ----                         | ----             | Mg <sup>2+</sup>           | ----                       | ----                 | A: D344, D240                              | ----                                                                  | column equilibration and elution: 0.25 mM EDTA             | crystallization: 20 mM MgSO <sub>4</sub>                                                                                                                                            |                                                                                                                         |
|               |               | Norwalk virus             | 2B43   | 2.30           | ----                         | ----             | ----                       | ----                       | ----                 | ----                                       | ----                                                                  | ----                                                       | Not information                                                                                                                                                                     | Not information                                                                                                         |
|               |               | Norwalk virus             | 3BSN   | 1.80           | Mn <sup>2+</sup>             | Mn <sup>2+</sup> | ----                       | GOL, N5C                   | ----                 | ----                                       | A: D343, D344, D242, N5C<br>B: D343, Y243, D242, N5C                  | primer, template                                           | column equilibration: 1 mM EDTA column elution and dialyztion: 0.5 mM EDTA                                                                                                          | crystallization: 0.97 mM NCT, 0.92 mM MgCl <sub>2</sub> , 2.31 mM MnCl <sub>2</sub>                                     |
|               |               | Norwalk virus             | 3BSO   | 1.74           | Mn <sup>2+</sup>             | Mn <sup>2+</sup> | ----                       | GOL, CTP                   | ----                 | ----                                       | A: D343, D344, D242, CTP<br>B: D343, Y243, D242, CTP                  | primer, template                                           | column equilibration: 1 mM EDTA column elution and dialyztion: 0.5 mM EDTA                                                                                                          | crystallization: 0.97 mM CTP; 0.92 mM MgCl <sub>2</sub> ; 2.31 mM MnCl <sub>3</sub>                                     |
|               |               | Norwalk virus             | 3H5Y   | 1.77           | Mn <sup>2+</sup>             | Mn <sup>2+</sup> | Mn <sup>2+</sup>           | GOL, CTP                   | ----                 | ----                                       | A: D343, D344, D242, CTP<br>B: D343, Y243, D242, CTP<br>C: D344, A241 | primer, template                                           | column equilibration: 1 mM EDTA column elution and dialyztion: 0.5 mM EDTA                                                                                                          | soaking: 1.7 mM MgCl <sub>2</sub> , 4.3, 6.0 or 13 mM MnCl <sub>2</sub> , 7 mM CTP, 7mM MnCl <sub>2</sub> .             |
|               |               | Norwalk virus             | 3H5X   | 1.77           | Mn <sup>2+</sup>             | Mn <sup>2+</sup> | Mn <sup>2+</sup>           | GOL, CSG                   | ----                 | ----                                       | A: D343, CSG<br>B: D343, Y243, CSG<br>C: D344, A241                   | primer, template                                           | column equilibration: 1 mM EDTA column elution and dialyztion: 0.5 mM EDTA                                                                                                          | soaking: 1.7 mM MgCl <sub>2</sub> and either 4.3, 6.0 or 13 mM MnCl <sub>2</sub> , 7 mM CTP and 7mM MnCl <sub>2</sub> . |
| Sapovirus     | Sapporo virus | Sapporo virus             | 2CKW   | 2.32           | ----                         | ----             | ----                       | ----                       | ----                 | ----                                       | ----                                                                  | dialyztion: 5 mM MgCl <sub>2</sub>                         | ----                                                                                                                                                                                |                                                                                                                         |
|               |               | Sapporo virus             | 2UUV   | 2.76           | ----                         | ----             | ----                       | ----                       | ----                 | ----                                       | D347G, D348G                                                          | ----                                                       | No information                                                                                                                                                                      |                                                                                                                         |
|               |               | Sapporo virus             | 2UUT   | 2.40           | ----                         | ----             | ----                       | ----                       | ----                 | ----                                       | D346G                                                                 | ----                                                       | No information                                                                                                                                                                      |                                                                                                                         |
|               |               | Sapporo virus             | 2WK4   | 2.98           | ----                         | ----             | ----                       | GOL                        | ----                 | ----                                       | D347G, D348G                                                          | ----                                                       | No information                                                                                                                                                                      |                                                                                                                         |
| Flaviviridae  | Flavivirus    | Dengue virus              | 2J7U   | 1.85           | ----                         | ----             | Mg <sup>2+</sup>           | Cl, PGE, Zn <sup>2+</sup>  | ----                 | C: D664                                    | ----                                                                  | dialyztion, elution, gel filtration: 1 mM EDTA             | crystallization: 1 mM EDTA, qualification: MgSO <sub>4</sub> or Mg(CH <sub>3</sub> COO) <sub>2</sub> at concentrations of 0.005 to 0.2 M, soaking: 0.2 M MgCl <sub>2</sub>          |                                                                                                                         |
|               |               | Dengue virus              | 2J7W   | 2.60           | ----                         | ----             | ----                       | GTP, PEG, Zn <sup>2+</sup> | ----                 | ----                                       | ----                                                                  | dialyztion, elution, gel filtration: 1 mM EDTA             | crystallization: 1 mM EDTA, qualification: MgSO <sub>4</sub> or magnesium acetate at concentrations of 0.005 to 0.2 M, soaking: 40 mM MgSO <sub>4</sub> , 10 mM 3' <sup>t</sup> GTP |                                                                                                                         |
|               |               | West Nile virus           | 2HCN   | 2.35           | ----                         | ----             | Ca <sup>2+</sup>           | Zn <sup>2+</sup>           | ----                 | C: D536, D669                              | ----                                                                  | ----                                                       | crystallization: 0.2 M calcium acetate                                                                                                                                              |                                                                                                                         |
|               |               | West Nile virus           | 2HCS   | 2.50           | ----                         | ----             | ----                       | Zn <sup>2+</sup>           | ----                 | ----                                       | ----                                                                  | ----                                                       | No information                                                                                                                                                                      |                                                                                                                         |
|               |               | West Nile virus           | 2HFZ   | 2.50           | ----                         | ----             | Mg <sup>2+</sup>           | Zn <sup>2+</sup>           | ----                 | C: D536, D669, A534                        | ----                                                                  | ----                                                       | crystallization: 0.3 M MgCl <sub>2</sub>                                                                                                                                            |                                                                                                                         |
|               | Hepacivirus   | hepatitis C virus         | 2XWH   | 1.80           | ----                         | ----             | ----                       | 15P, PEG                   | ----                 | ----                                       | ----                                                                  | ----                                                       | dialyztion: 1 mM EDTA                                                                                                                                                               | ----                                                                                                                    |
|               |               | hepatitis C virus         | 1C2P   | 1.90           | ----                         | ----             | ----                       | MSE                        | ----                 | ----                                       | ----                                                                  | ----                                                       | ----                                                                                                                                                                                | ----                                                                                                                    |
|               |               | hepatitis C virus         | 1CSJ   | 2.80           | ----                         | ----             | ----                       | MSE                        | ----                 | ----                                       | ----                                                                  | ----                                                       | the sample was concentrated to 1 mM EDTA                                                                                                                                            | ----                                                                                                                    |
|               |               | hepatitis C virus         | 1GX5   | 1.70           | Mn <sup>2+</sup>             | Mn <sup>2+</sup> | ----                       | GTP, Mn <sup>2+</sup>      | ----                 | ----                                       | A: D318, D319, GTP<br>B: D318, T221, D220, GTP                        | ----                                                       | ----                                                                                                                                                                                | soaking: 10mM rGTP and 11 mM MnCl <sub>2</sub>                                                                          |

|  |                   |      |      |                  |                  |      |                                             |      |                                                      |                                                                               |                                                               |
|--|-------------------|------|------|------------------|------------------|------|---------------------------------------------|------|------------------------------------------------------|-------------------------------------------------------------------------------|---------------------------------------------------------------|
|  | hepatitis C virus | 1GX6 | 1.85 | Mn <sup>2+</sup> | Mn <sup>2+</sup> | ---- | UTP, Mn <sup>2+</sup>                       | ---- | A:D318, D319, D220, UTP<br>B:D318, T221, D220, UTP   | ----                                                                          | soaking: 10 mM rUTP and<br>11 mM MnCl <sub>2</sub>            |
|  | hepatitis C virus | 1NB4 | 2.00 | ----             | ----             | ---- | ---                                         | ---- | ----                                                 | ----                                                                          | bacteria pellet resuspension:<br>10 mM MgCl <sub>2</sub>      |
|  | hepatitis C virus | 1NB6 | 2.60 | Mn <sup>2+</sup> | Mn <sup>2+</sup> | ---- | UTP                                         | ---- | A: D318, D319, D220, UTP<br>B: D318, T221, D220, UTP | ----                                                                          | bacteria pellet resuspension:<br>10 mM MgCl <sub>2</sub>      |
|  | hepatitis C virus | 1NB7 | 2.90 | Mn <sup>2+</sup> | Mn <sup>2+</sup> | ---- | ----                                        | ---- | A: -<br>B: F224,C223, T221                           | short template                                                                | bacteria pellet resuspension:<br>10 mM MgCl <sub>2</sub>      |
|  | hepatitis C virus | 1NHU | 2.00 | ----             | ----             | ---- | 153                                         | ---- | ----                                                 | ----                                                                          | soaking: 10 mM MgCl <sub>2</sub>                              |
|  | hepatitis C virus | 1NHV | 2.90 | ----             | ----             | ---- | 154                                         | ---- | ----                                                 | ----                                                                          | soaking: 10 mM MgCl <sub>2</sub>                              |
|  | hepatitis C virus | 1OS5 | 2.20 | ----             | ----             | ---- | NH1                                         | ---- | ----                                                 | L47Q, F101Y, K114R                                                            | equilibration, storage: 5 mM<br>MgCl <sub>2</sub>             |
|  | hepatitis C virus | 1QUV | 2.50 | ----             | ----             | ---- | ----                                        | ---- | ----                                                 | R2963Q                                                                        | No information                                                |
|  | hepatitis C virus | 1YUY | 1.90 | ----             | ----             | ---- | SO <sub>4</sub>                             | ---- | ----                                                 | ----                                                                          | ----                                                          |
|  | hepatitis C virus | 1YV2 | 2.50 | ----             | ----             | ---- | GOL, SO <sub>4</sub>                        | ---- | ----                                                 | ----                                                                          | ----                                                          |
|  | hepatitis C virus | 1YVF | 2.50 | ----             | ----             | ---- | Cl <sup>-</sup> , GOL, PH7, PO <sub>4</sub> | ---- | ----                                                 | ----                                                                          | No information                                                |
|  | hepatitis C virus | 1YVX | 2.00 | ----             | ----             | ---- | IPC, SO <sub>4</sub>                        | ---- | ----                                                 | ----                                                                          | ----                                                          |
|  | hepatitis C virus | 1YVZ | 2.20 | ----             | ----             | ---- | JPC, SO <sub>4</sub>                        | ---- | ----                                                 | ----                                                                          | ----                                                          |
|  | hepatitis C virus | 1Z4U | 2.80 | ----             | ----             | ---- | Cl <sup>-</sup> , GOL, PH9, PO <sub>4</sub> | ---- | ----                                                 | ----                                                                          | No information                                                |
|  | hepatitis C virus | 2AWZ | 2.15 | ----             | ----             | ---- | 5H, SO <sub>4</sub>                         | ---- | ----                                                 | V499A, S506N, Q514R,<br>T520I, P540A, S543G,<br>V552T, S563G, L564V,<br>R566H | column equilibration: 10 mM<br>MgCl <sub>2</sub>              |
|  | hepatitis C virus | 2AX0 | 2.00 | ----             | ----             | ---- | 5X, SO <sub>4</sub>                         | ---- | ----                                                 | V499A, S506N, Q514R,<br>T520I, P540A, S543G,<br>V552T, S563G, L564V,<br>R566H | column equilibration: 10 mM<br>MgCl <sub>2</sub>              |
|  | hepatitis C virus | 2AX1 | 2.10 | ----             | ----             | ---- | 5EE, SO <sub>4</sub>                        | ---- | ----                                                 | 499A, S506N, Q514R,<br>T520I, P540A, S543G,<br>V552T, S563G, L564V,<br>R566H  | column equilibration: 10 mM<br>MgCl <sub>2</sub>              |
|  | hepatitis C virus | 2BRK | 2.30 | Mn <sup>2+</sup> | Mn <sup>2+</sup> | ---- | CMF                                         | ---- | A: D318, D319, D220<br>B: D318, T221, D220           | ----                                                                          | equilibration: 1 mM EDTA                                      |
|  | hepatitis C virus | 2BRL | 2.40 | Mn <sup>2+</sup> | Mn <sup>2+</sup> | ---- | POO                                         | ---- | A: D318, D319, D220<br>B: D318, T221, D220           | ----                                                                          | equilibration: 1 mM EDTA                                      |
|  | hepatitis C virus | 2D3U | 2.00 | ----             | ----             | ---- | CCT                                         | ---- | ----                                                 | ----                                                                          | soaking: 10 mM MgCl <sub>2</sub>                              |
|  | hepatitis C virus | 2D3Z | 1.80 | ----             | ----             | ---- | FIH                                         | ---- | ----                                                 | ----                                                                          | soaking: 10 mM MgCl <sub>2</sub>                              |
|  | hepatitis C virus | 2D41 | 2.10 | ----             | ----             | ---- | SNH                                         | ---- | ----                                                 | ----                                                                          | soaking: 10 mM MgCl <sub>2</sub>                              |
|  | hepatitis C virus | 2DXS | 2.20 | ----             | ----             | ---- | JTP                                         | ---- | ----                                                 | ----                                                                          | ----                                                          |
|  | hepatitis C virus | 2FVC | 2.00 | ----             | ----             | ---- | 888                                         | ---- | ----                                                 | ----                                                                          | No information                                                |
|  | hepatitis C virus | 2GC8 | 2.20 | ----             | ----             | ---- | 885                                         | ---- | ----                                                 | ----                                                                          | No information                                                |
|  | hepatitis C virus | 2GIQ | 1.65 | ----             | ----             | ---- | NN2                                         | ---- | ----                                                 | ----                                                                          | ----                                                          |
|  | hepatitis C virus | 2GIR | 1.90 | ----             | ----             | ---- | NN3                                         | ---- | ----                                                 | ----                                                                          | ----                                                          |
|  | hepatitis C virus | 2HAI | 1.58 | ----             | ----             | ---- | PFI                                         | ---- | ----                                                 | K114R, L47Q, F101Y                                                            | No information                                                |
|  | hepatitis C virus | 2HWH | 2.30 | ----             | ----             | ---- | RNA(inhibitor)                              | ---- | ----                                                 | ----                                                                          | ----                                                          |
|  | hepatitis C virus | 2HWI | 2.00 | ----             | ----             | ---- | VRX                                         | ---- | ----                                                 | ----                                                                          | ----                                                          |
|  | hepatitis C virus | 2I1R | 2.20 | ----             | ----             | ---- | VXR                                         | ---- | ----                                                 | ----                                                                          | No information                                                |
|  | hepatitis C virus | 2I1N | 2.20 | ----             | ----             | ---- | 221                                         | ---- | ----                                                 | ----                                                                          | ----                                                          |
|  | hepatitis C virus | 2JC0 | 2.20 | ----             | ----             | ---- | 699                                         | ---- | ----                                                 | ----                                                                          | Column equilibration and<br>wash, and storage: 0.1 mM<br>EDTA |
|  | hepatitis C virus | 2JC1 | 2.00 | ----             | ----             | ---- | 698                                         | ---- | ----                                                 | ----                                                                          | No information                                                |
|  | hepatitis C virus | 2O5D | 2.20 | ----             | ----             | ---- | VR1                                         | ---- | ----                                                 | ----                                                                          | No information                                                |
|  | hepatitis C virus | 2QE2 | 2.90 | ----             | ----             | ---- | 452                                         | ---- | ----                                                 | ----                                                                          | ----                                                          |
|  | hepatitis C virus | 2QE5 | 2.60 | ----             | ----             | ---- | 617                                         | ---- | ----                                                 | ----                                                                          | ----                                                          |
|  | hepatitis C virus | 2WCX | 2.00 | Mn <sup>2+</sup> | Mn <sup>2+</sup> | ---- | VGC                                         | ---- | A: D318, D319, D220<br>B: D318, T221, D220           | ----                                                                          | soaking: 10 mM MnCl <sub>2</sub>                              |
|  | hepatitis C virus | 2WHO | 2.00 | Mn <sup>2+</sup> | Mn <sup>2+</sup> | ---- | VGI                                         | ---- | A: D318, D319, D220<br>B: D318, T221, D220           | ----                                                                          | soaking: 10 mM MnCl <sub>2</sub>                              |
|  | hepatitis C virus | 2WRM | 1.95 | ----             | ----             | ---- | QQ3                                         | ---- | ----                                                 | ----                                                                          | No information                                                |



|                       |                      |                                       |      |      |      |      |                      |                                                  |          |                                      |                                     |                                                               |                                                                                                                                |
|-----------------------|----------------------|---------------------------------------|------|------|------|------|----------------------|--------------------------------------------------|----------|--------------------------------------|-------------------------------------|---------------------------------------------------------------|--------------------------------------------------------------------------------------------------------------------------------|
|                       |                      | bovine viral diarrhea virus           | 1S4F | 3.00 | ---- | ---- | ----                 | ----                                             | ----     | ----                                 | ----                                | ----                                                          | ----                                                                                                                           |
|                       |                      | bovine viral diarrhea virus           | 2CJQ | 2.60 | ---- | ---- | ----                 | ----                                             | ----     | ----                                 | ----                                | ----                                                          | ----                                                                                                                           |
| <i>Leviviridae</i>    | <i>Allolevivirus</i> | enterobacteria virus Q $\beta$        | 3AGP | 2.80 | ---- | ---- | Ca <sup>2+</sup>     | ----                                             | ----     | C: D968, D1054, E1089                | ----                                | ----                                                          | crystallization: C <sub>4</sub> H <sub>6</sub> CaO <sub>4</sub>                                                                |
|                       |                      | enterobacteria virus Q $\beta$        | 3AGQ | 3.22 | ---- | ---- | Mg <sup>2+</sup>     | ----                                             | ----     | C: D968, D1054                       | ----                                | ----                                                          | crystallization: Mg(CH <sub>2</sub> COO) <sub>2</sub>                                                                          |
|                       |                      | enterobacteria virus Q $\beta$        | 3MMP | 2.50 | ---- | ---- | ----                 | PXN                                              | ----     | ----                                 | elongation factor Tu2 and Ts        | ----                                                          | ----                                                                                                                           |
| <i>Picornaviridae</i> | <i>Aphthovirus</i>   | foot and mouth disease virus          | 1U09 | 1.91 | ---- | ---- | ----                 | ----                                             | ----     | ----                                 | ----                                | dialyzation: 1 mM EDTA                                        | ----                                                                                                                           |
|                       |                      | foot and mouth disease virus          | 1WNE | 3.00 | ---- | ---- | Mg <sup>2+</sup>     | ----                                             | ----     | C: D238, V239, D240, D339            | template, primer                    | dialyzation: 1 mM EDTA                                        | crustallization: 2 mM MgCl <sub>2</sub>                                                                                        |
|                       |                      | foot and mouth disease virus          | 2F8E | 2.90 | ---- | ---- | ----                 | U5P, Mg <sup>2+</sup> , Mn <sup>2+</sup>         | ----     | ----                                 | ----                                | dialyzation: 1 mM EDTA                                        | crystallization: 2 mM UTP, 2 mM MnCl <sub>2</sub> and 2 mM MgCl <sub>2</sub>                                                   |
|                       |                      | foot and mouth disease virus          | 2D7S | 3.00 | ---- | ---- | ----                 | ----                                             | ----     | ----                                 | VPg                                 | dialyzation: 1 mM EDTA                                        | crystallization: 2 mM MnCl <sub>2</sub>                                                                                        |
|                       |                      | foot and mouth disease virus          | 2EC0 | 2.75 | ---- | ---- | Mg <sup>2+</sup>     | PPV                                              | ----     | C: D238, T384, D339                  | template, primer                    | dialyzation: 1 mM EDTA                                        | crystallization: 2 mM MgCl <sub>2</sub> , soaking: 2 mM ATP, 2 mM MnCl <sub>2</sub>                                            |
|                       |                      | foot and mouth disease virus          | 2E9Z | 3.00 | ---- | ---- | Mg <sup>2+</sup> (?) | Mg <sup>2+</sup>                                 | PPV, UTP | B: UTP, Y241<br>C: D238, T384, D339  | template, primer                    | dialyzation: 1 mM EDTA                                        | crystallization: 2 mM MgCl <sub>2</sub> , soaking: 2 mM MnCl <sub>2</sub> ; 2 mM UTP                                           |
|                       |                      | foot and mouth disease virus          | 2E9T | 2.60 | ---- | ---- | Mg <sup>2+</sup> (?) | Mg <sup>2+</sup>                                 | PPV      | C: T384, D339, D238                  | template, primer (modified 5FU)     | dialyzation: 1 mM EDTA                                        | crystallization 2 mM MgCl <sub>2</sub> ; soaking 2 mM MnCl <sub>2</sub> and 2 mM FUTP                                          |
|                       |                      | foot and mouth disease virus          | 2E9R | 2.81 | ---- | ---- | Mg <sup>2+</sup>     | RTP                                              | ----     | C: D238, D339                        | template, primer                    | dialyzation: 1 mM EDTA                                        | crystallization: 2 mM MgCl <sub>2</sub> ; soaking: 2 mM MnCl <sub>2</sub> and 2 mM RTP                                         |
|                       |                      | foot and mouth disease virus          | 3KOA | 2.40 | ---- | ---- | Mg <sup>2+</sup> (?) | Mg <sup>2+</sup>                                 | DPO      | B: Y241<br>C: D339, D240, D238, T384 | two polyribonucleotides; M2961      | dialyzation: 1 mM EDTA                                        | crystallization: 2 mM MgCl <sub>2</sub> ; soaking: 2 mM MnCl <sub>2</sub> , and 2 mM GTP                                       |
|                       |                      | foot and mouth disease virus          | 3KNA | 2.80 | ---- | ---- | Mg <sup>2+</sup>     | ----                                             | ----     | C: D238, D240, D339, T384            | two polyribonucleotides; M2961      | dialyzation: 1 mM EDTA                                        | crystallization: 2 mM MgCl <sub>2</sub> ; soaking: 2 mM MnCl <sub>2</sub> , and 2 mM GTP                                       |
|                       |                      | foot and mouth disease virus          | 3KMS | 2.20 | ---- | ---- | Mg <sup>2+</sup>     | ----                                             | ----     | C: D238, D240                        | two polyribonucleotides; G62S       | dialyzation: 1 mM EDTA                                        | crystallization: 2 mM MgCl <sub>2</sub> ; soaking: 2 mM MnCl <sub>2</sub> , and 2 mM GTP                                       |
|                       |                      | foot and mouth disease virus          | 3KMQ | 2.11 | ---- | ---- | ----                 | ----                                             | ----     | ----                                 | two polyribonucleotides; G62S       | dialyzation: 1 mM EDTA                                        | crystallization: 2 mM MgCl <sub>2</sub> ; soaking: 2 mM MnCl <sub>2</sub> , and 2 mM GTP                                       |
|                       |                      | foot and mouth disease virus          | 3KLV | 2.60 | ---- | ---- | Mg <sup>2+</sup>     | ----                                             | ----     | C: D238, D339, T384                  | two polyribonucleotides; G62S M2961 | dialyzation: 1 mM EDTA                                        | crystallization: 2 mM MgCl <sub>2</sub> ; soaking: 2 mM MnCl <sub>2</sub> , and 2 mM GTP                                       |
|                       | <i>Enterovirus</i>   | human enterovirus B (coxsackie virus) | 3CDW | 2.50 | ---- | ---- | ----                 | ACT, Cl <sup>-</sup> , GOL, POP                  | ----     | ----                                 | VPg                                 | ----                                                          | incubation before crystallization: 2.5 mM 3'dUTP and 10 mM MgCl <sub>2</sub>                                                   |
|                       |                      | human enterovirus B (coxsackie virus) | 3CDU | 2.10 | ---- | ---- | ----                 | ACT, Cl <sup>-</sup> , GOL, POP, SO <sub>4</sub> | ----     | ----                                 | ----                                | ----                                                          | incubation before crystallization: 10 mM NTP and 10 mM MgCl <sub>2</sub> or MnCl <sub>2</sub>                                  |
|                       |                      | human enterovirus B (coxsackie virus) | 3DDK | 2.25 | ---- | ---- | ----                 | Na <sup>+</sup> , SO <sub>4</sub>                | ----     | ----                                 | ----                                | ----                                                          | ----                                                                                                                           |
|                       |                      | human enterovirus C (poliovirus)      | 1RDR | 2.40 | ---- | ---- | Ca <sup>2+</sup>     | ----                                             | ----     | C: D233, D329                        | ----                                | protein loading onto column, washing and elution: 0.1 mM EDTA | crystallization: 0.6 M CaCl <sub>2</sub> ; 0.2 mM EDTA harvested into and soaking: 1.0–1.2 M CaCl <sub>2</sub> and 0.2 mM EDTA |
|                       |                      | human enterovirus C (poliovirus)      | 1TQL | 2.30 | ---- | ---- | ----                 | ACY                                              | ----     | ----                                 | G1A, L446D, R455D                   | protein loading onto column, washing and elution: 0.1 mM EDTA | ----                                                                                                                           |
|                       |                      | human enterovirus C (poliovirus)      | 1RAJ | 2.35 | ---- | ---- | ----                 | ----                                             | ----     | ----                                 | L446A, R455D                        | protein loading onto column, washing and elution: 0.1 mM EDTA | ----                                                                                                                           |

|  |  |                                  |      |      |                      |                      |      |      |                                              |            |                                                 |                                       |                                                               |                                                                                 |
|--|--|----------------------------------|------|------|----------------------|----------------------|------|------|----------------------------------------------|------------|-------------------------------------------------|---------------------------------------|---------------------------------------------------------------|---------------------------------------------------------------------------------|
|  |  | human enterovirus C (poliovirus) | 1RA7 | 2.50 | ----                 | ----                 | ---- | ---- | ACY, GTP                                     | ----       | ----                                            | L446D, R455D                          | protein loading onto column, washing and elution: 0.1 mM EDTA | ----                                                                            |
|  |  | human enterovirus C (poliovirus) | 1RA6 | 2.00 | ----                 | ----                 | ---- | ---- | ACY                                          | ----       | ----                                            | L446D, R455D                          | protein loading onto column, washing and elution: 0.1 mM EDTA | ----                                                                            |
|  |  | human enterovirus C (poliovirus) | 2ILZ | 2.50 | Mn <sup>2+</sup>     | Mn <sup>2+</sup>     | ---- | ---- | ACY, GTP, Mn <sup>2+</sup> , Na <sup>+</sup> | ----       | A: D328<br>B: Y234, GTP                         | L446D, R455D                          | ----                                                          | soaking: 10 mM GTP and 10 mM MnCl <sub>2</sub>                                  |
|  |  | human enterovirus C (poliovirus) | 2ILY | 2.60 | ----                 | ----                 | ---- | ---- | ACY, ATP, Na <sup>+</sup>                    | ----       | ----                                            | L446D, R455D                          | ----                                                          | soaking: 10 mM ATP and 10 mM MgCl <sub>2</sub>                                  |
|  |  | human enterovirus C (poliovirus) | 2IM3 | 2.60 | Mn <sup>2+</sup> (?) | Mn <sup>2+</sup> (?) | ---- | ---- | ACY, Na <sup>+</sup> , UTP                   | ----       | A: D328<br>B: D328, Y234, UTP                   | L446D, R455D                          | ----                                                          | soaking: 10 mM UTP and 10 mM MnCl <sub>2</sub>                                  |
|  |  | human enterovirus C (poliovirus) | 2IM2 | 2.35 | ----                 | ----                 | ---- | ---- | ACY, Na <sup>+</sup> , UTP                   | ----       | ----                                            | L446D, R455D                          | ----                                                          | soaking: 10 mM UTP and 10 mM MgCl <sub>2</sub>                                  |
|  |  | human enterovirus C (poliovirus) | 2IM1 | 2.50 | Mn <sup>2+</sup> (?) | Mn <sup>2+</sup> (?) | ---- | ---- | ACY, CTP, Na <sup>+</sup> , Mn <sup>2+</sup> | ----       | A: D328<br>B: Y234, CTP                         | L446D, R455D                          | ----                                                          | soaking: 10 mM CTP and 10 mM MnCl <sub>2</sub>                                  |
|  |  | human enterovirus C (poliovirus) | 2IM0 | 2.25 | ----                 | ----                 | ---- | ---- | ACY, CTP, Na <sup>+</sup>                    | ----       | ----                                            | L446D, R455D                          | ----                                                          | soaking: 10 mM CTP and 10 mM MgCl <sub>2</sub>                                  |
|  |  | human enterovirus C (poliovirus) | 2IJF | 3.00 | ----                 | ----                 | ---- | ---- | ----                                         | ----       | ----                                            | G64S, L446D, R455D                    | 0.5 mM EDTA                                                   | ----                                                                            |
|  |  | human enterovirus C (poliovirus) | 2IJD | 3.40 | ----                 | ----                 | ---- | ---- | SO <sub>4</sub> , Zn <sup>2+</sup>           | ----       | ----                                            | E55A, D58A, E63A, C147A, L629D, R638D | 0.5 mM EDTA                                                   | ----                                                                            |
|  |  | human enterovirus C (poliovirus) | 3OLA | 2.55 | ----                 | ----                 | ---- | ---- | DCP, GOL, IPA, PEG, Zn <sup>2+</sup>         | elongation | ----                                            | L446D, template, product, nontemplate | column equilibration: 5 mM MgCl <sub>2</sub>                  | soaking: 10 mM MgCl <sub>2</sub> and 5 mM CTP, 2'-dCTP, 3'-dCTP, or 2',3'-ddCTP |
|  |  | human enterovirus C (poliovirus) | 3OLB | 2.41 | ----                 | ----                 | ---- | ---- | DCT, IPA, Zn <sup>2+</sup>                   | elongation | ----                                            | L446D, template, product, nontemplate | column equilibration: 5 mM MgCl <sub>2</sub>                  | soaking: 10 mM MgCl <sub>2</sub> and 5 mM CTP, 2'-dCTP, 3'-dCTP, or 2',3'-ddCTP |
|  |  | human enterovirus C (poliovirus) | 3OL6 | 2.50 | ----                 | ----                 | ---- | ---- | IPA, Zn <sup>2+</sup>                        | elongation | ----                                            | L446D, template, product, nontemplate | column equilibration: 5 mM MgCl <sub>2</sub>                  | soaking: 10 mM MgCl <sub>2</sub> and 5 mM CTP, 2'-dCTP, 3'-dCTP, or 2',3'-ddCTP |
|  |  | human enterovirus C (poliovirus) | 3OL7 | 2.70 | Mg <sup>2+</sup>     | Mg <sup>2+</sup>     | ---- | ---- | GOL, IPA, PEG, POP, Zn <sup>2+</sup>         | elongation | A: D328, D329, D233<br>B: D238, Y234, D233      | L446D, template, product, nontemplate | column equilibration: 5 mM MgCl <sub>2</sub>                  | soaking: 10 mM MgCl <sub>2</sub> and 5 mM CTP, 2'-dCTP, 3'-dCTP, or 2',3'-ddCTP |
|  |  | human enterovirus C (poliovirus) | 3OL8 | 2.75 | Mn <sup>2+</sup>     | Mn <sup>2+</sup>     | ---- | ---- | GOL, IPA, POP, Zn <sup>2+</sup>              | elongation | A: D328, D329, D233<br>B: D328, Y234, D233, POP | L446D, template, product, nontemplate | column equilibration: 5 mM MgCl <sub>2</sub>                  | soaking: 10 mM MnCl <sub>2</sub> and 5 mM CTP, 2'-dCTP, 3'-dCTP, or 2',3'-ddCTP |
|  |  | human enterovirus C (poliovirus) | 3OL9 | 2.25 | ----                 | ----                 | ---- | ---- | IPA, POP, Zn <sup>2+</sup>                   | elongation | ----                                            | L446D, template, product, nontemplate | column equilibration: 5 mM MgCl <sub>2</sub>                  | soaking: 10 mM MgCl <sub>2</sub> and 5 mM CTP, 2'-dCTP, 3'-dCTP, or 2',3'-ddCTP |
|  |  | human rhinovirus A               | 1TP7 | 2.40 | ----                 | ----                 | ---- | ---- | DMX, SO <sub>4</sub>                         | ----       | ----                                            | ----                                  | ----                                                          | ----                                                                            |
|  |  | human rhinovirus A               | 1XR5 | 2.80 | Sm <sup>3+</sup> (?) | ----                 | ---- | ---- | ----                                         | ----       | ----                                            | ----                                  | ----                                                          | soaking: 0.25 mM SmCl <sub>3</sub>                                              |
|  |  | human rhinovirus A               | 1XR6 | 2.50 | ----                 | ----                 | ---- | ---- | K <sup>+</sup>                               | ----       | ----                                            | ----                                  | ----                                                          | crystallization: ATP analog AMPPNP: 2 mM MnCl <sub>2</sub> or MgCl <sub>2</sub> |
|  |  | human rhinovirus A               | 1XR7 | 2.30 | ----                 | ----                 | ---- | ---- | ----                                         | ----       | ----                                            | ----                                  | ----                                                          | crystallization: ATP analog AMPPNP: 2 mM MnCl <sub>2</sub> or MgCl <sub>2</sub> |

Double-stranded RNA viruses

| Family | Genus | Species | PDB ID | Resolution (Å) | Catalytic ion A | Catalytic ion B | Non-catalytic ion, C | Ligands | Stage of replication | Metal interactions | Presence of template and primer, mutations | Purification and storage | Crystallization |
|--------|-------|---------|--------|----------------|-----------------|-----------------|----------------------|---------|----------------------|--------------------|--------------------------------------------|--------------------------|-----------------|
|--------|-------|---------|--------|----------------|-----------------|-----------------|----------------------|---------|----------------------|--------------------|--------------------------------------------|--------------------------|-----------------|

|                     |                      |                                 |      |      |                      |                      |                  |                  |            |                                                                   |                                |                                    |                                                                                                                                                                       |
|---------------------|----------------------|---------------------------------|------|------|----------------------|----------------------|------------------|------------------|------------|-------------------------------------------------------------------|--------------------------------|------------------------------------|-----------------------------------------------------------------------------------------------------------------------------------------------------------------------|
| <i>Birnaviridae</i> | <i>Avibirnavirus</i> | infectious bursal disease virus | 2PGG | 2.50 | ----                 | ----                 | ----             | ----             | ----       | ----                                                              | ----                           | ----                               | ----                                                                                                                                                                  |
|                     |                      | infectious bursal disease virus | 2QJ1 | 3.48 | ----                 | ----                 | ----             | ----             | ----       | ----                                                              | ----                           | ----                               | No information                                                                                                                                                        |
|                     |                      | infectious bursal disease virus | 2PUS | 2.40 | ----                 | ----                 | ----             | ----             | ----       | ----                                                              | ----                           | ----                               | ----                                                                                                                                                                  |
|                     |                      | infectious bursal disease virus | 2R70 | 2.70 | ----                 | ----                 | ----             | ----             | ----       | ----                                                              | ----                           | ----                               | ----                                                                                                                                                                  |
|                     |                      | infectious bursal disease virus | 2R72 | 3.15 | Mg <sup>2+</sup> (?) | Mg <sup>2+</sup> (?) | Mg <sup>2+</sup> | ----             | ----       | A: N493, D402<br>B: D402, G420, L417<br>C: N403, D416, I415, S414 | ----                           | ----                               | soaking: 2 mM MgCl <sub>2</sub> and 2 mM GTP                                                                                                                          |
| <i>Cystoviridae</i> | <i>Cystovirus</i>    | pseudomonas phage φ6            | 1HI0 | 3.00 | Mg <sup>2+</sup> (?) | Mg <sup>2+</sup> (?) | Mn <sup>2+</sup> | GTP              | initiation | A: GTP<br>B: D453, V325, GTP<br>C: D454, E491, A495               | short template                 | elution from the column: 1 mM EDTA | crystallization: 8 mM MgCl <sub>2</sub> ,<br>Soaking: 10 mM AMPPNP, AMPGPP or CTP (all in the presence of 2 mM MnCl <sub>2</sub> )                                    |
|                     |                      | pseudomonas phage φ6            | 1HI8 | 2.50 | ----                 | ----                 | Mg <sup>2+</sup> | ----             | ----       | C: D454, E491, A495                                               | ----                           | elution from the column: 1 mM EDTA | crystallization: 8 mM MgCl <sub>2</sub>                                                                                                                               |
|                     |                      | pseudomonas phage φ6            | 1HI1 | 3.00 | ----                 | ----                 | ----             | ATP              | ----       | ----                                                              | ----                           | elution from the column: 1 mM EDTA | crystallization: 8 mM MgCl <sub>2</sub> ,<br>Soaking: 10 mM AMPPNP, AMPGPP or CTP (all in the presence of 2 mM MnCl <sub>2</sub> )                                    |
|                     |                      | pseudomonas phage φ6            | 1HHS | 2.00 | ----                 | ----                 | Mn <sup>2+</sup> | ----             | ----       | C: D454, E491, A495                                               | ----                           | elution from the column: 1 mM EDTA | crystallization: 8 mM MgCl <sub>2</sub>                                                                                                                               |
|                     |                      | pseudomonas phage φ6            | 1HHT | 2.90 | ----                 | ----                 | Mn <sup>2+</sup> | ----             | ----       | C: D454, E491, A495                                               | template                       | elution from the column: 1 mM EDTA | crystallization: 8 mM MgCl <sub>2</sub> ;<br>soaking: 2 mM MnCl <sub>2</sub>                                                                                          |
|                     |                      | pseudomonas phage φ6            | 1UVI | 2.15 | ----                 | ----                 | Mn <sup>2+</sup> | ----             | ----       | C: D454, E491, A495                                               | template                       | elution from the column: 1 mM EDTA | soaking: 40–60 mM GTP and 25 mM Mg <sup>2+</sup> and Ca <sup>2+</sup> ;<br>In the presence of 2 mM MnCl <sub>2</sub>                                                  |
|                     |                      | pseudomonas phage φ6            | 1UVJ | 1.90 | ----                 | ----                 | Mn <sup>2+</sup> | ----             | ----       | C: D454, E491, A495                                               | ribonucleotide                 | elution from the column: 1 mM EDTA | soaking: 40–60 mM GTP and 25 mM Mg <sup>2+</sup> and Ca <sup>2+</sup> ;<br>In the presence of 2 mM MnCl <sub>2</sub>                                                  |
|                     |                      | pseudomonas phage φ6            | 1UVK | 2.45 | ----                 | ----                 | Mn <sup>2+</sup> | Mg <sup>2+</sup> | ----       | C: D454, E491, A495                                               | ----                           | elution from the column: 1 mM EDTA | soaking: 40–60 mM GTP and 25 mM Mg <sup>2+</sup> and Ca <sup>2+</sup> ;<br>In the presence of 2 mM MnCl <sub>2</sub>                                                  |
|                     |                      | pseudomonas phage φ6            | 1UVL | 2.00 | ----                 | ----                 | Mn <sup>2+</sup> | ----             | ----       | C: D454, E491, A495                                               | template                       | elution from the column: 1 mM EDTA | soaking: 40–60 mM GTP and 25 mM Mg <sup>2+</sup> and Ca <sup>2+</sup> ;<br>In the presence of 2 mM MnCl <sub>2</sub>                                                  |
|                     |                      | pseudomonas phage φ6            | 1UVN | 3.00 | Ca <sup>2+</sup> (?) | Ca <sup>2+</sup> (?) | Mn <sup>2+</sup> | GTP              | ----       | A: Y630, GTP<br>B: D453, V325, GTP<br>C: D454, E491, A495         | polyribonucleotide             | elution from the column: 1 mM EDTA | soaking: 40–60 mM GTP and 25 mM Mg <sup>2+</sup> and Ca <sup>2+</sup> ;<br>In the presence of 2 mM MnCl <sub>2</sub>                                                  |
|                     |                      | pseudomonas phage φ6            | 1UVM | 2.00 | ----                 | ----                 | Mn <sup>2+</sup> | ----             | ----       | C: D454, E491, A495                                               | template                       | elution from the column: 1 mM EDTA | soaking: 40–60 mM GTP and 25 mM Mg <sup>2+</sup> and Ca <sup>2+</sup> ;<br>In the presence of 2 mM MnCl <sub>2</sub>                                                  |
|                     |                      | pseudomonas phage φ6            | 1WAC | 3.00 | ----                 | ----                 | ----             | ----             | ----       | ----                                                              | ----                           | ----                               | ----                                                                                                                                                                  |
|                     |                      | pseudomonas phage φ6            | 2JLG | 2.80 | ----                 | Mn <sup>2+</sup>     | ----             | GTP              | ----       | B: D435, V325, D324, GTP                                          | polydeoxyribonucleotide, E491Q | elution from the column: 1 mM EDTA | Soaking: 5 mM MnCl <sub>2</sub> to the crystallization drop, followed a few seconds later by the addition of 5 mM MgCl <sub>2</sub> and, immediately after, 25 mM GTP |
|                     |                      | pseudomonas phage φ6            | 2JLF | 3.20 | ----                 | ----                 | Mn <sup>2+</sup> | ----             | ----       | C: D454, E491, A495                                               | E491Q                          | elution from the column: 1 mM EDTA | crystallization: 2 mM MnCl <sub>2</sub>                                                                                                                               |
|                     |                      | pseudomonas phage φ6            | 2JL9 | 3.20 | ----                 | ----                 | ----             | ----             | ----       | ----                                                              | E491Q                          | elution from the column: 1 mM EDTA | ----                                                                                                                                                                  |

|                   |                      |                    |      |      |                  |                  |                  |                  |            |                                                      |                       |                         |                                                                                      |
|-------------------|----------------------|--------------------|------|------|------------------|------------------|------------------|------------------|------------|------------------------------------------------------|-----------------------|-------------------------|--------------------------------------------------------------------------------------|
| <i>Reoviridae</i> | <i>Orthoreovirus</i> | mammalian reovirus | 1N1H | 2.80 | Mn <sup>2+</sup> | Mn <sup>2+</sup> | ----             | CH1,G7M,GDP, GH3 | initiation | A: D585, D734, D735, CH1<br>B: I586, D585, D734, CH1 | polyribonucleotide    | purification: 1 mM EDTA | soaking: 1 mM 3'-deoxy rGTP, 1 mM 3'-deoxy rCTP and 1.5 mM Mn <sup>2+</sup>          |
|                   |                      | mammalian reovirus | 1N35 | 2.50 | Mn <sup>2+</sup> | Mn <sup>2+</sup> | ----             | CH1              | elongation | A: D585, D734, D735, CH1<br>B: I586, D585, D734, CH1 | 2 polyribonucleotides | purification: 1 mM EDTA | soaking: 1 mM rGTP, 1 mM 3'-deoxy rCTP and 1.5 mM Mn <sup>2+</sup>                   |
|                   |                      | mammalian reovirus | 1N38 | 2.80 | Mn <sup>2+</sup> | Mn <sup>2+</sup> | ----             | CH1, U3H         | elongation | A: D585, D734, D735, CH1<br>B: I586, D585, D734, CH1 | polyribonucleotide    | purification: 1 mM EDTA | soaking: 1.5 mM Mn <sup>2+</sup> , 1 mM 3'-deoxy rUTP, 1 mM 3'-deoxy rCTP, 1 mM rGTP |
|                   |                      | mammalian reovirus | 1MUK | 2.50 | ----             | ----             | ----             | ----             | ----       | ----                                                 | ----                  | purification: 1 mM EDTA | ----                                                                                 |
|                   |                      | mammalian reovirus | 1MWH | 2.50 | ----             | ----             | Mn <sup>2+</sup> | GTG              | ----       | C: D585, D735, E780                                  | ----                  | purification: 1 mM EDTA | ----                                                                                 |
|                   | <i>Rotavirus</i>     | simian rotavirus   | 2R7R | 2.60 | ----             | ----             | ----             | ----             | ----       | ----                                                 | polyribonucleotide    | ----                    | ----                                                                                 |
|                   |                      | simian rotavirus   | 2R7S | 3.24 | ----             | ----             | ----             | PO <sub>4</sub>  | ----       | ----                                                 | polyribonucleotide    | ----                    | ----                                                                                 |
|                   |                      | simian rotavirus   | 2R7T | 3.00 | ----             | ----             | ----             | ----             | ----       | ----                                                 | polyribonucleotide    | ----                    | ----                                                                                 |
|                   |                      | simian rotavirus   | 2R7U | 3.10 | ----             | ----             | ----             | ----             | ----       | ----                                                 | polyribonucleotide    | ----                    | ----                                                                                 |
|                   |                      | simian rotavirus   | 2R7V | 2.60 | ----             | ----             | ----             | ----             | ----       | ----                                                 | polyribonucleotide    | ----                    | ----                                                                                 |
|                   |                      | simian rotavirus   | 2R7W | 2.60 | ----             | ----             | ----             | GTP              | ----       | ----                                                 | polyribonucleotide    | ----                    | ----                                                                                 |
|                   |                      | simian rotavirus   | 2R7X | 2.80 | ----             | ----             | ----             | GTP              | ----       | ----                                                 | polyribonucleotide    | ----                    | ----                                                                                 |
|                   |                      | simian rotavirus   | 2R7Q | 2.90 | ----             | ----             | ----             | ----             | ----       | ----                                                 | ----                  | ----                    | ----                                                                                 |
|                   |                      | simian rotavirus   | 2R7O | 3.35 | ----             | ----             | ----             | ----             | ----       | ----                                                 | ----                  | ----                    | ----                                                                                 |

<sup>1</sup> (?) Indicates that the ion is likely to be a catalytic ion, but not in the catalytic site.

<sup>2</sup> Abbreviations for the ligands

|                 |                                                                                                                                                                   |
|-----------------|-------------------------------------------------------------------------------------------------------------------------------------------------------------------|
| 153             | (2s)-2-[(2,4-dichloro-benzoyl)-(3-trifluoromethyl-benzyl)-amino]-3-phenyl-propionic acid                                                                          |
| 154             | (2s)-2-[(5-benzofuran-2-yl-thiophen-2-ylmethyl)-(2,4-dichloro-benzoyl)-amino]-3-phenyl-propionic acid                                                             |
| 221             | (2r,3r)-3-[(3,5-bis(trifluoromethyl)phenyl)amino]-2-cyano-3-thioxopropanamide                                                                                     |
| 321             | n-[(3-[5-hydroxy-2-(3-methylbutyl)-3-oxo-6-thiophen-2-yl-2,3-dihydropyridazin-4-yl]-1,1-dioxido-2h-1,4-benzothiazin-7-yl)methanesulfonamide                       |
| 452             | 2-[[n-(2-acetyl-5-chloro-4-fluorophenyl)glycyl]amino]benzoic acid                                                                                                 |
| 617             | 2-[[4-(chlorophenoxy)acetyl]amino]benzoic acid                                                                                                                    |
| 698             | (2s,4s,5r)-1-(4-tert-butylbenzoyl)-2-isobutyl-5-(1,3-thiazol-2-yl)pyrrolidine-2,4-dicarboxylic acid                                                               |
| 699             | (2s,4s,5r)-2-isobutyl-5-(2-thienyl)-1-[4-(trifluoromethyl)benzoyl]pyrrolidine-2,4-dicarboxylic acid                                                               |
| 885             | 1-[(2-amino-4-chloro-5-methylphenyl)sulfonyl]-l-proline                                                                                                           |
| 888             | 3-(1,1-dioxido-4h-1,2,4-benzothiadiazin-3-yl)-4-hydroxy-1-(3-methylbutyl)quinolin-2(1h)-one                                                                       |
| 15P             | polyethylene glycol (n=34)                                                                                                                                        |
| 1B8             | (7r)-14-cyclohexyl-7-[[2-(dimethylamino)ethyl](methyl)amino]-7,8-dihydro-6h-indolo[1,2-e][1,5]benzoxazocine-11-carboxylic acid                                    |
| 1PD             | 2-[(3-[5-hydroxy-2-(3-methylbutyl)-3-oxo-6-(1,3-thiazol-5-yl)-2,3-dihydropyridazin-4-yl]-1,1-dioxido-2h-1,2,4-benzothiadiazin-7-yl)oxy]acetamide                  |
| 2PD             | 5-hydroxy-4-(7-methoxy-1,1-dioxido-2h-1,2,4-benzothiadiazin-3-yl)-2-(3-methylbutyl)-6-phenylpyridazin-3(2h)-one                                                   |
| 3MS             | n-[(3-[4-hydroxy-1-(3-methylbutyl)-2-oxo-1,2-dihydropyridol[1,2-b]pyridazin-3-yl]-1,1-dioxido-2h-1,2,4-benzothiadiazin-7-yl)methanesulfonamide                    |
| 4MS             | n-[(3-[(5s)-5-tert-butyl-1-(3-chloro-4-fluorobenzyl)-4-hydroxy-2-oxo-2,5-dihydro-1h-pyrrol-3-yl]-1,1-dioxido-1,2-benzisothiazol-7-yl)methyl)methanesulfonamide    |
| 5EE             | 5r-(3,4-dichlorophenylmethyl)-3-(2-thiophenesulfonylamino)-4-oxo-2-thionothiazolidine                                                                             |
| 5FU             | 5-fluoro-uridine-5'-monophosphate                                                                                                                                 |
| 5H              | 5r-(4-bromophenylmethyl)-3-(benzenesulfonylamino)-4-oxo-2-thionothiazolidine                                                                                      |
| 5X              | 5r-(2e-methyl-3-phenyl-allyl)-3-(benzenesulfonylamino)-4-oxo-2-thionothiazolidine                                                                                 |
| 77Z             | 2-(((3r)-3-[(3s)-1-(3-methylbutyl)-2,4-dioxo-1,2,3,4-tetrahydroquinolin-3-yl]-1,1-dioxido-3,4-dihydro-2h-1,2,4-benzothiadiazin-7-yl)oxy)acetamide                 |
| 79Z             | 5-cyclopropyl-2-(4-fluorophenyl)-6-[(2-hydroxyethyl)(methylsulfonyl)amino]-n-methyl-1-benzofuran-3-carboxamide                                                    |
| ACT             | acetate ion                                                                                                                                                       |
| ACY             | acetic acid                                                                                                                                                       |
| AG0             | (6r)-6-cyclopentyl-6-[2-(2,6-diethylpyridin-4-yl)ethyl]-3-[(5,7-dimethyl[1,2,4]triazolo[1,5-a]pyrimidin-2-yl)methyl]-4-hydroxy-5,6-dihydro-2h-pyran-2-one         |
| AG6             | n-[(benzyloxy)carbonyl]-l-alpha-glutamyl- n-[(1s)-4-oxo-4-phenyl-1-propylbut-2-en-1-yl]-l-phenylalaninamide                                                       |
| ATP             | adenosine-5'-triphosphate                                                                                                                                         |
| B34             | (5s)-1-benzyl-3-(1,1-dioxido-1,2-benzisothiazol-3-yl)-4-hydroxy-5-(1-methylethyl)-1,5-dihydro-2h-pyrrol-2-one                                                     |
| B42             | n-[(3-[(5r)-1-cyclopentyl-4-hydroxy-5-methyl-5-(3-methylbutyl)-2-oxo-1,2,5,6-tetrahydropyridin-3-yl]-1,1-dioxido-4h-1,2,4-benzothiadiazin-7-yl)methanesulfonamide |
| B5P             | n-[(3-[5-hydroxy-8-(3-methylbutyl)-7-oxo-7,8-dihydroimidazo[1,2-a]pyrimidin-6-yl]-1,1-dioxido-4h-1,2,4-benzothiadiazin-7-yl)methanesulfonamide                    |
| B80             | n-[(3-[(6s)-6-ethyl-1-(4-fluorobenzyl)-4-hydroxy-2-oxo-1,2,5,6-tetrahydropyridin-3-yl]-1,1-dioxido-2h-1,2,4-benzothiadiazin-7-yl)methanesulfonamide               |
| BIW             | 1-[2-(4-carboxypiperidin-1-yl)-2-oxoethyl]-3-cyclohexyl-2-furan-3-yl-1h-indole-6-carboxylic acid                                                                  |
| CCT             | 5-(4-cyanophenyl)-3-[[2-(methylphenyl)sulfonyl]amino]thiophene-2-carboxylic acid                                                                                  |
| CH1             | 3'-deoxy-cytidine-5'-triphosphate                                                                                                                                 |
| Cl <sup>-</sup> | chloride ion                                                                                                                                                      |
| CMF             | 3-cyclohexyl-1-(2-morpholin-4-yl-2-oxoethyl)-2-phenyl-1h-indole-6-carboxylic acid                                                                                 |
| CSG             | 2'-amino-2'-deoxycytidine 5'-(tetrahydrogen triphosphate)                                                                                                         |
| CTP             | cytidine-5'-triphosphate                                                                                                                                          |
| DCP             | 2'-deoxycytidine-5'-triphosphate                                                                                                                                  |
| DCT             | 2',3'-dideoxycytidine 5'-triphosphate                                                                                                                             |
| DEY             | (2r)-2-[(3-[5-hydroxy-2-(3-methylbutyl)-3-oxo-6-thiophen-2-yl-2,3-dihydropyridazin-4-yl]-1,1-dioxido-2h-1,2,4-benzothiadiazin-7-yl)oxy]propanamid                 |
| DMX             | 3-[benzyl(dimethyl)ammonio]propane-1-sulfonate                                                                                                                    |
| DPO             | diphosphate                                                                                                                                                       |
| FIH             | 5-(4-fluorophenyl)-3-[[4-(methylphenyl)sulfonyl]amino]thiophene-2-carboxylic acid                                                                                 |
| FUTP            | fluoro-uridine-5'-triphosphate                                                                                                                                    |
| G7M             | n7-methyl-guanosine-5'-monophosphate                                                                                                                              |
| GDP             | guanosine-5'-diphosphate                                                                                                                                          |
| GH3             | 3'-deoxy-guanosine-5'-triphosphate                                                                                                                                |

GOL glycerol  
 GTG 7-methyl-guanosine-5'-triphosphate-5'-guanosine  
 GTP guanosine-5'-triphosphate  
 H59 n-{3-[(5s)-5-(1,1-dimethylpropyl)-1-(4-fluoro-3-methylbenzyl)-4-hydroxy-2-oxo-2,5-dihydro-1h-pyrrol-3-yl]-1,1-dioxido-4h-1,4-benzothiazin-7-yl)methanesulfonamide  
 H5S (5s)-5-tert-butyl-1-(4-fluoro-3-methylbenzyl)-4-hydroxy-3-β-(methylsulfonyl)-1,1-dioxido-6,7,8,9-tetrahydroisothiazolo[4,5-h]isoquinolin-3-yl]-1,5-dihydro-2h-pyrrol-2-one  
 HJZ 3-[2-(trans-4-methylcyclohexyl)phenyl]-5-phenylthiophene-2-carboxylic acid  
 IPA isopropyl alcohol  
 IPC 3-isopropyl(4-methylbenzoyl)amino]-5-phenylthiophene-2-carboxylic acid  
 IX6 11s)-10-[(2,5-dimethyl-1,3-oxazol-4-yl)carbonyl]-11-(2-fluoro-4-[(2-methylprop-2-en-1-yl)oxy]phenyl)-3,3-dimethyl-2,3,4,5,10,11-hexahydrothiopyrano[3,2-b][1,5]benzodiazepin-6-ol 1,1-dioxide  
 JPC 3-[(2,4-dichlorobenzoyl)(isopropyl)amino]-5-phenylthiophene-2-carboxylic acid  
 JTP n-[(13-cyclohexyl-6,7-dihydroindolo[1,2-d][1,4]benzoxazepin-10-yl)carbonyl]-2-methyl-l-alanine  
 K<sup>+</sup> kalium ion  
 LT6 2-(2-[(1s)-1-benzyl-2-hydroxyethyl]amino)-2-oxoethoxy)-n-butyl-6-fluoro-n-methylbenzamide  
 Mg<sup>2+</sup> magnesium ion  
 Mn<sup>2+</sup> manganese ion  
 MSE selenomethionine  
 N34 n-{3-[1-(3,3-dimethyl-butyl)-4-hydroxy-2-oxo-1,2,4a,5,6,7-hexahydro-pyrrolo[1,2-b]pyridazin-3-yl]-1,1-dioxo-1,2-dihydro-1λ6-benzo[1,2,4]thiadiazin-7-yl)methanesulfonamide  
 N35 n-{3-[5-hydroxy-2-(3-methylbutyl)-3-oxo-6-pyrrolidin-1-yl-2,3-dihydropyridazin-4-yl]-1,1-dioxido-2h-1,2,4-benzothiadiazin-7-yl)methanesulfonamide  
 N3H n-{3-[5-hydroxy-2-(3-methylbutyl)-3-oxo-6-thiophen-2-yl-2,3-dihydropyridazin-4-yl]-1,1-dioxido-2h-1,2,4-benzothiadiazin-7-yl)methanesulfonamide  
 N5C 5-nitrocytidine 5'-(tetrahydrogen triphosphate)  
 Na<sup>+</sup> natrium ion  
 NH1 3-(4-amino-2-tert-butyl-5-methyl-phenylsulfanyl)-6-cyclopentyl-4-hydroxy-6-[2-(4-hydroxy-phenyl)-ethyl]-5,6-dihydro-pyran-2-one  
 Ni<sup>2+</sup> nickel ion  
 NN2 1-(2-cyclopropylethyl)-3-(1,1-dioxido-2h-1,2,4-benzothiadiazin-3-yl)-6-fluoro-4-hydroxyquinolin-2(1h)-one  
 NN3 3-[isopropyl[(trans-4-methylcyclohexyl)carbonyl]amino]-5-phenylthiophene-2-carboxylic acid  
 PEG di(hydroxyethyl)ether  
 PFI (6s)-6-cyclopentyl-6-[2-(3-fluoro-4-isopropoxyphenyl)ethyl]-4-hydroxy-5,6-dihydro-2h-pyran-2-one  
 PGE triethylene glycol  
 PH7 (2z)-2-(benzoylamino)-3-[4-(2-bromophenoxy)phenyl]-2-propenoic acid  
 PH9 (2z)-2-[(1-adamantylcarbonyl)amino]-3-[4-(2-bromophenoxy)phenyl]prop-2-enoic acid  
 PHQ benzyl chlorocarbonate  
 PO4 phosphate ion  
 POO 3-cyclohexyl-1-(2-{methyl[(1-methylpiperidin-3-yl)methyl]amino}-2-oxoethyl)-2-phenyl-1h-indole-6-carboxylic acid  
 POP pyrophosphate 2-  
 PPV pyrophosphate  
 PXN (2s)-1-[3-[(2r)-2-hydroxypropyl]oxy]-2,2-bis([(2r)-2-hydroxypropyl]oxy)methyl)propoxypropan-2-ol  
 QQ3 (3r)-3-(4-methyl-1,3-dioxo-1,3-dihydro-2h-pyrrolo[3,4-c]quinolin-2-yl)hexanoic acid  
 RTP ribavirin triphosphate  
 SNH 5'-acetyl-4-[(2,4-dimethylphenyl)sulfonyl]amino]-2,2'-bithiophene-5-carboxylic acid  
 SO4 sulfate ion  
 SX1 2-amino-5-bromobenzoic acid  
 SX2 4-[(5-bromopyridin-2-yl)amino]-4-oxobutanoic acid  
 SX3 4-bromo-2-[(3r,5s)-3,5-dimethylpiperidin-1-yl]carbonyl]aniline  
 SX4 4-bromo-2-[(2r)-2-(2-chlorobenzyl)pyrrolidin-1-yl]carbonyl]aniline  
 SX5 4-[(4-bromo-2-[(3r,5s)-3,5-dimethylpiperidin-1-yl]carbonyl)phenyl]amino]-4-oxobutanoic acid  
 SX6 n-(4-bromo-2-[(3r,5s)-3,5-dimethylpiperidin-1-yl]carbonyl)phenyl)-4-morpholin-4-yl-4-oxobutanamide  
 T18 n-{3-[6-fluoro-1-(4-fluorobenzyl)-4-hydroxy-2-oxo-1,2-dihydroquinolin-3-yl]-1,1-dioxido-4h-1,4-benzothiazin-7-yl)methanesulfonamide  
 U3H 3'-deoxy-uridine 5'-triphosphate  
 U5P uridine 5'-monophosphate  
 UTP uridine 5'-triphosphate  
 VGC 4-(2-aminoethoxy)-n-(3-chloro-5-piperidin-1-ylphenyl)-3,5-dimethylbenzamide  
 VGI 2-(3-bromophenyl)-6-[(2-hydroxyethyl)amino]-1h-benzo[de]isoquinoline-1,3(2h)-dione  
 VR1 (2s)-2-(((5z)-5-[(5-ethyl-2-furyl)methylene]-4-oxo-4,5-dihydro-1,3-thiazol-2-yl)amino)-2-(4-fluorophenyl)-n-[(4-nitrophenyl)sulfonyl]acetamide  
 VRX (2s)-(((5z)-5-[(5-ethyl-2-furyl)methylene]-4-oxo-4,5-dihydro-1,3-thiazol-2-yl)amino)(4-fluorophenyl)acetic acid  
 VXR (5z)-5-[(5-ethyl-2-furyl)methylene]-2-[(s)-(4-fluorophenyl)(1h-tetrazol-5-yl)methyl]amino)-1,3-thiazol-4(5h)-one  
 XNC (11s)-11-[4-(benzyloxy)-2-fluorophenyl]-3,3-dimethyl-10-[(6-methylpyridin-2-yl)carbonyl]-2,3,4,5,10,11-hexahydrothiopyrano[3,2-b][1,5]benzodiazepin-6-ol 1,1-dioxide  
 XND (11r)-10-acetyl-11-(2,4-dichlorophenyl)-6-hydroxy-3,3-dimethyl-2,3,4,5,10,11-hexahydro-1h-dibenzo[b,e][1,4]diazepin-1-one  
 XNI (11s)-10-acetyl-11-[4-(benzyloxy)-3-chlorophenyl]-3,3-dimethyl-2,3,4,5,10,11-hexahydro-1h-dibenzo[b,e][1,4]diazepin-1-one  
 XNZ (11r)-10-acetyl-11-[4-(benzyloxy)-2-chlorophenyl]-6-hydroxy-3,3-dimethyl-2,3,4,5,10,11-hexahydro-1h-dibenzo[b,e][1,4]diazepin-1-one  
 YAK n-{3-[(4ar,7as)-1-(4-fluorobenzyl)-4-hydroxy-2-oxo-2,4a,5,6,7,7a-hexahydro-1h-cyclopenta[b]pyridin-3-yl]-1,1-dioxido-2h-1,2,4-benzothiadiazin-7-yl)methanesulfonamide  
 Zn<sup>2+</sup> zinc ion
